# 1 Axonal gap junctions in the fly visual 2 system enable fast prediction for 3 evasive flight maneuvers

4 Siwei Wang<sup>1,2,4\*</sup>, Alexander Borst<sup>3</sup>, Idan Segev<sup>1,2</sup>, Stephanie Palmer<sup>4\*</sup>

**\*For correspondence:**

[siweiw@uchicago.edu](mailto:siweiw@uchicago.edu) (FMS);  
[sepalmer@uchicago.edu](mailto:sepalmer@uchicago.edu) (FMS)

5 <sup>1</sup>Department of Neurobiology, Hebrew University of Jerusalem; <sup>2</sup>The Edmond and Lily  
6 Safra Center for Brain Sciences, Hebrew University of Jerusalem; <sup>3</sup>Max Planck Institute  
7 Neurobiology; <sup>4</sup>Department of Organismal Biology and Anatomy, University of Chicago

---

## 9 Abstract

10 The visual system must make predictions to compensate for inherent delays in its processing, yet  
11 little is known, mechanistically, about how prediction aids natural behaviors. Here we show that  
12 despite a 30ms intrinsic processing delay, the vertical motion sensitive (VS) network of the blowfly  
13 can achieve maximally efficient prediction. This prediction enables fine discrimination of input  
14 motion direction during evasive flight maneuvers, which last just 40ms. Combining a rich database  
15 of behavioral recordings with detailed compartmental modeling of the VS network, we further  
16 show how the VS network implements this optimal prediction. The axonal gap junctions between  
17 the VS cells are crucial for optimal prediction during the short timespan of evasive maneuvers. Its  
18 subpopulation output further selectively conveys predictive information about the future visual  
19 input to the downstream neck motor center. Our work predicts novel sensory-motor pathways that  
20 link prediction to behavior.

---

## 22 Introduction

23 Escape from predators is critical for survival. Escape behaviors can take on a variety of forms,  
24 from the triggering of a reflexive startle response (e.g. the c-bend escape in zebrafish (*Lopez-Schier,*  
25 *2019*), fly escape take-offs (*Card and Dickinson, 2008*), to more ongoing behaviors that require  
26 continuous sensory processing (e.g. escape from a looming threat during flight (*Schilling and Borst,*  
27 *2015; Hanlon, 2018*)). In the latter kind of escape, here called an ‘evasive maneuver’, the organism  
28 needs to update its motor output dynamically as the escape unfolds. Although most animals  
29 steer away from imminent threats, the trajectories of escapes, even for similar threats, are highly  
30 variable (*Domenici et al., 2011*). To a certain degree, such variability makes the escape maneuver  
31 unpredictable in the eyes of the predator. This feature prevents the predator from learning  
32 to anticipate a stereotyped escape pattern and foiling the escape. During ongoing behaviors,  
33 generating this kind of escape response requires actively controlled and finely stimulus-tuned  
34 maneuvers. Therefore, the escape trajectory is predictable to the animal because it must maintain  
35 good control of its motor plant. Here we investigate how fine-controlled variation is instantiated in  
36 evasive responses while animals are engaged in ongoing behaviors.

37 Insects, especially diptera, are excellent models for exploring this problem. For the animal  
38 models in this work, the blowfly and the drosophila, both precise measurements of the motion  
39 executed during their evasive behaviors (*Muijres et al., 2014*) and mechanistic level understanding  
40 of the underlying neuronal circuits (*Cuntz et al., 2007; Weber et al., 2008*) are available. Furthermore,

41 insect brain architecture is highly conserved. Flies in particular use similar neural architecture  
42 to drive similar behaviors (*Dickinson, 2014*). Escape behaviors and the corresponding sensory-  
43 motor circuits controlling them emerged as early as flight itself, 400 million years ago (*Dickinson,*  
44 *2014*). Many modern arthropod species thus inherited this core sensory-behavioral module. In  
45 particular, both blowflies and drosophila use banked turns to change their heading direction,  
46 during both stereotypical saccadic flights (*Muijres et al., 2015; Schilstra and Hateren, 1999; Hateren*  
47 *and Schilstra, 1999*) and visually induced turns (*Balint and Dickinson, 2001; Muijres et al., 2014*).  
48 Despite their size differences (a blowfly is roughly four times larger than a drosophila), recent work  
49 has shown that the electrotonic structures and neuronal functions of motion sensitive neurons  
50 between these two animals are analogous (*Cuntz et al., 2013*). Meanwhile, the banked turns they  
51 make with their bodies are similar in shape (*Schilstra and Hateren, 1999; Hateren and Schilstra,*  
52 *1999; Muijres et al., 2015*), while drosophila show a slower overall profile of angular velocity (*van*  
53 *Breugel and Dickinson, 2012; Schilstra and Hateren, 1999*). In addition, drosophila do not use  
54 additional head banking to stabilize their retinal input, possibly because of the lower acuity in  
55 their compound eyes compared to the blowfly. Because the only precise measurements of the  
56 fly's evasive maneuver are available in drosophila (*Muijres et al., 2014*) and the only mechanistic  
57 understanding of the neural circuit that processes the visual input during these maneuvers is from  
58 the blowfly (*Cuntz et al., 2007; Weber et al., 2008; Borst and Weber, 2011*), but the two species are  
59 so similar overall, we use the behavioral measurements from drosophila to investigate how the  
60 blowfly's motion sensing circuit extracts behaviorally relevant information for this survival-critical  
61 maneuver. Blowflies have higher angular velocity during their banked turns and higher acuity in  
62 their compound eyes, thus we hypothesize that the blowfly must perform evasive maneuvers in a  
63 more precise and finely controlled manner than drosophila. Hence, this investigation will show the  
64 minimum necessary computation that the blowfly's neural circuit must execute during fast evasive  
65 maneuvers.

66 Drosophila are capable of performing in-flight evasive maneuvers after a 60ms sensory-motor  
67 delay (*Muijres et al., 2014*). These evasive maneuvers use a mere 40ms to reorient the animal's  
68 heading and accelerate it away from the threat. Previous work showed that such maneuvers consist  
69 of visually-guided banked turns followed immediately by active counter-banked turns. Perhaps  
70 to be maximally unpredictable to the predator (*Domenici et al., 2011*), these escape maneuvers  
71 show substantial variability in their initial heading and subsequent flight trajectory, though they  
72 are finely controlled throughout their execution (i.e. this variability is not just noise) (*Muijres et al.,*  
73 *2014*). Thus, these maneuvers are not simply reflexive patterns or gestures that are triggered in an  
74 all-or-none fashion; even within the brief 40ms time frame of the escape response, sensory-motor  
75 circuits in the fly brain continuously transform visual information into the motor commands that  
76 control flight.

77 We set out to explore how visual information from escaping a purely visual threat is used to  
78 sculpt the fly's evasive maneuver. Because the fly visual system has a 30ms processing lag (*Land and*  
79 *Collett, 1974*), it is unlikely that evasive maneuvers use visual information through feedback given  
80 their brief, 40ms time span. Previous work (*Muijres et al., 2014*) hypothesized that either evasive  
81 maneuvers are guided by a single feed-forward program or that the fly uses mechanosensory  
82 feedback from the halteres to sculpt the active counter-bank turns during the escape. Haltere  
83 steering neurons make direct electric synapses with motoneurons of wing steering muscles (*Heide,*  
84 *1983; Fayyazuddin and Dickinson, 1996, 1999*) that can cause fast alterations of wing kinematics  
85 (*Bergou et al., 2010; Ristroph et al., 2010*) with only a 15-20ms delay. Thus, the halteres could  
86 initiate the active counter-bank turns, about halfway through the fly's escape maneuver. Previous  
87 work have shown that these haltere neurons also use visual input during flight to regulate their  
88 activity (*Dickerson et al., 2019*). This suggests that the feed-forward output of the fly visual system  
89 at the beginning of evasive maneuver may be used by the halteres to regulate evasive flight roughly  
90 20ms after the evasive maneuver starts. Since the evasive maneuver is a fast and large repositioning  
91 of the fly's body and flight path, this would only be a useful visual input if it contained significant

92 information about the future state of the fly's posture and heading. In this work, we investigate  
93 how the fly uses predictive information from the visual system for active flight control.

94 Specifically, we hypothesize that if the fly can predict the future visual input that it will experience  
95 during the evasive maneuver, it can use such information to actively control the banked and counter  
96 banked turns that it will execute. Given the exceptionally short time scale of the evasive maneuver,  
97 we focus on the bottom-up prediction (i.e., no feedback). To be effective, this prediction exploits  
98 the temporal correlations between past and future visual stimuli during evasive maneuvers. Said  
99 another way, the fly's evasive maneuver is initiated with a particular heading change that is selected  
100 in the moment and based on the purely visual threat cue. The escape trajectory depends on the  
101 threat angle relative to the fly's heading (*Muijres et al., 2014*). Where and how the escape maneuver  
102 begins constrains how it will unfold, giving the visual system ample predictive power with which  
103 to guide active flight control. We show how this bottom-up prediction provides information about  
104 future sensory input, subverting delays in the visual input stream. Encoding of optimal predictive  
105 information exists in the vertebrate retina (*Palmer et al., 2015*) and may ensure fluid interaction  
106 with the external environment. It may also be important in the formation of long-term memory  
107 (*Berman et al., 2016*). Here we hypothesize that such bottom-up prediction in the fly visual system  
108 enables it to control brief evasive maneuvers that are critical for survival.

109 Because the banked/counter-banked turns of the evasive maneuvers are combinations of pitch  
110 and roll rotations, we focus on how visual prediction emerges in the vertical motion sensing (VS)  
111 network of the fly visual system, i.e. the sensory system dedicated to encoding these specific  
112 rotation angles (*Borst and Weber, 2011*). The fly visual system is organized in four consecutive  
113 layers: retina, lamina, lobula and lobula plate. The VS network consists of 10 lobula plate tangential  
114 cells (the VS cells) in each compound eye. It receives retinotopically organized local motion inputs  
115 and outputs global motion information in its axonal voltages. Each VS cell has its dendritic receptive  
116 field center at a specific rotational axis of the fly's coronal plane. They are numbered VS1-VS10 along  
117 the fly's anterior-posterior axis according to their receptive field location. Not only is the VS network  
118 essential for generating proper optomotor responses, silencing this network also eliminates the  
119 fly's escape response (*Schilling and Borst, 2015*). The output from the VS network arises from  
120 subpopulations of adjacent cell triplets, which target different downstream areas (*Borst and Weber,*  
121 *2011; Haag et al., 2007*). In particular, the VS network connects to the downstream neck motor  
122 center only through the VS 5-6-7 triplet of cells (*Hagg and Borst, 1996; Haag et al., 2007*), which  
123 have dendritic receptive fields located at the center of the field of view of the fly.

124 The VS network has a chain-like structure (*Hagg and Borst, 1996; Haag and Borst, 2004, 2005;*  
125 *Cuntz et al., 2007*). Each VS cell only connects with other VS cells having immediately neighboring  
126 receptive fields. Meanwhile, the VS1 and VS10 cells show reciprocal inhibition (*Haag and Borst,*  
127 *2007*). Previous dual-recording experiments (*Haag and Borst, 2004*) showed that VS cells connect  
128 amongst each other through electrical synapses. Further dye-coupling experiments showed that  
129 these electrical synapses were gap junctions (*Haag and Borst, 2005*). In (*Cuntz et al., 2007*), they  
130 further identified that these gap junctions are located at the axons of VS cells. By having these  
131 axonal gap junctions, the VS network implements an electrotonic segregation mechanism between  
132 its dendrites and axons: all VS cells show broadened receptive fields at their axons compared to  
133 those at their dendrites. These broadened receptive fields improve the encoding robustness of  
134 motion stimuli (*Cuntz et al., 2007; Elyada et al., 2009*) at the output of the VS network. Recent work  
135 also shows that this wiring architecture, coupled with subpopulation readout from the VS 5-6-7  
136 triplet, enables near-optimal encoding of constant speed rotations (*Wang et al., 2017*). In this work,  
137 we focus on behavioral constraints imposed by fast evasive flights maneuvers, asking whether this  
138 same wiring architecture supports visual prediction on a fast enough time scale to efficiently guide  
139 evasive maneuvers.

140 To explore this hypothesis, ideally one would trace the activity of the VS cells in behaving animals.  
141 However, evasive flight maneuvers require untethered flight, which makes population recording  
142 from the VS network prohibitive. Here instead we use numerical simulations of a biophysically

143 realistic compartmental reconstruction of the VS network to investigate how the VS network might  
144 encode this kind of fast, predictive information. This compartmental reconstruction of the VS  
145 network is highly experimentally constrained (Cuntz *et al.*, 2007; Weber *et al.*, 2008). All single-cell  
146 (Hagg and Borst, 1996) and neuronal circuitry parameters (Haag and Borst, 2004, 2005; Cuntz *et al.*,  
147 2007) are set such that this compartmental reconstruction behaves as does the real VS network  
148 when presented with the same current injection (Weber *et al.*, 2008; Haag and Borst, 2004, 2005).  
149 Based on how the output of the VS network encodes predictive information about the visual inputs  
150 during recorded evasive maneuvers, we first demonstrate that axonal gap junctions are essential  
151 for input prediction in the VS network during evasive maneuvers. Next, we show that this predictive  
152 information, present at the output of the VS network, is near-optimal throughout the duration of  
153 evasive maneuvers. We further show that the output circuitry of the VS network (the VS 5-6-7 triplet)  
154 to the neck motor center retains all available information about future stimuli, i.e., compressing the  
155 readout does not sacrifice how much a downstream pathway knows about the ongoing evasive  
156 maneuver. Finally, we show that the predictive information about future visual inputs can be used  
157 for fine scale discrimination between input motion directions. The encoding of such predictive  
158 information is especially beneficial for fine-tuning subsequent motor behavior. Our results also  
159 predict the existence of a novel sensory-motor pathway between the visual system and a visually  
160 gated motoneuron of wing steering muscles, namely the second basalare motoneurons (M.b2) (Tu  
161 and Dickinson, 1996; Heide and Götz, 1996; Dickson *et al.*, 2006; Lindsay *et al.*, 2017).

## 162 Results

### 163 Visual prediction provides substantial information about motion without delay

164 **Figure 1** shows that visual prediction contains substantial information about future motion for  
165 controlling evasive flight maneuvers. We first use a schematic trace to illustrate the inputs and  
166 delays in the system (**Figure 1A**). Previous work shows that the feedback from the halteres onto  
167 motoneurons of wing steering muscles only becomes available after a 15-20ms delay (Muijres  
168 *et al.*, 2014; Dickinson and Muijres, 2016), towards the second half of the maneuver, right before  
169 the active counter-banked turn starts. Visual feedback would also arrive too late, coming online  
170 only after 30ms, long after the banked turn is replaced by the counter-banked turn through active  
171 control (Dickinson and Muijres, 2016).

172 To quantify how much visual prediction encodes about the stimulus (**Figure 1B**), we define this  
173 stimulus-relevant predictive information in the output voltage from the fly VS network as:

$$\begin{aligned} I_{future:stim}(\Delta t) &= I(V_{past}; stim_{future}) = I(V_t; stim_{t+\Delta t}) \\ &= \iint_{V_t, stim_{t+\Delta t}} p(V_t) p(stim_{t+\Delta t} | V_t) \log_2 \frac{p(stim_{t+\Delta t} | V_t)}{p(V_t)}, \end{aligned} \quad (1)$$

174 where  $V_t$  is the output axonal voltage of the VS network at time  $t$ .  $\Delta t$  is the time interval between  
175 the past voltage and future visual stimulus. Here we use intervals of  $\Delta t = 10ms, 20ms, 30ms, 40ms$  to  
176 obtain the output of the VS network. This is because the maximum firing rate of the descending  
177 neuron connecting to the neck motor center is 100Hz (Weber *et al.*, 2008), which corresponds to an  
178 integration step of at least 10ms (see Methods and Materials). Throughout this paper, we represent  
179 the future rotational stimulus  $stim_{t+\Delta t}$ , by its vector components ( $\cos(stim_{t+\Delta t}), \sin(stim_{t+\Delta t})$ ). The  
180 cosine component corresponds to roll direction/magnitude and the sine component corresponds  
181 to pitch direction/magnitude. This vector is within the fly's coronal plane, to which the VS neurons  
182 are selectively sensitive. We then estimate  $p(stim_{t+\Delta t})$ , i.e., the stimuli distribution and  $p(stim_{t+\Delta t} | V_t)$ ,  
183 i.e., the probability of the future stimulus conditioned on the past output axonal voltage to obtain  
184  $I_{future:stim}$  (see Methods and Materials). **Figure 1B** shows that the predictive information  $I_{future:stim}$   
185 in the VS output voltage about the future stimulus captures nearly 50% of the entropy of the future  
186 motion. This suggests that the predictive information encoded by the VS network is an important  
187 information source for evasive flight behaviors, in the natural environment.

188 To evaluate  $I_{future:stim}$ , we need to approximate both the stimulus distribution and the respective  
 189 output distribution of the VS network. To obtain the stimulus distribution, we generate 650,000  
 190 samples of visual field motion trajectories based on behavioral recordings published in (*Muijres*  
 191 *et al., 2014*). Each visual experience corresponds to one instance of a particular evasive maneuver  
 192 embedded in a randomly selected set of nature scene images. There are 10,000 samples for each  
 193 of the 65 evasive flight trajectories with duration of 40ms (out of the total 92 published trajectories  
 194 in (*Muijres et al., 2014*)). *Figure 1C* shows one exemplar visual experience of a particular evasive  
 195 maneuver trajectory with the blue arrow as the instant rotation trajectory. Here, we obtain the  
 196 “cage” of natural images for simulation by randomly selecting six images out of the van Hateren  
 197 dataset (*van Hateren, 1992*) and patch them onto the six faces of a cube. Then we generate a  
 198 movie mimicking the evasive flight in the natural environment by rotating this natural scene cage  
 199 according to the measured rotations in the evasive flight trajectory (we do not use the translation  
 200 component of the evasive maneuver in this simulation because previous work showed that the VS  
 201 network is not sensitive to translation (*Borst and Weber, 2011*), also see Methods and Materials).  
 202 We next project this movie onto 5,500 local motion detectors, whose responses are integrated  
 203 as the input current of the VS network (*Figure 1D*). This simulation procedure is the same as that  
 204 described in (*Trousdale et al., 2014*). Previously, we showed that the VS network can use its own  
 205 transient response (10ms after the onset of stimuli) to encode the stimulus with constant rotational  
 206 motion at a relatively high fidelity (*Wang et al., 2017*). Here we use a behaviorally realistic, highly  
 207 variable visual input and explore its intrinsic correlation structure, to investigate how the fly’s brain  
 208 use this predictive information to make fast and accurate sensory predictions.

### 209 Axonal gap junctions enable prediction during evasive maneuvers

210 *Figure 2* shows that the anatomical locations of the gap junctions have significant impact on the  
 211 predictive encoding capability of the VS network. Located in the lobula plate, the VS network does  
 212 not have direct access to the visual input. Instead, the dendrites of all VS cells receive current inputs  
 213 resulting from integrating the outputs from hundreds of upstream local motion detectors (*Haag*  
 214 *and Borst, 2004*). Here, we use correlations in the VS input current induced by the stimulus as a  
 215 proxy for the stimulus correlations, themselves, which can be in turn used to encode predictive  
 216 information about the future stimulus. In this encoding scheme, the correlation between the past  
 217 and the future of the input current itself limits how much predictive information the VS network  
 218 can encode. This generalized correlation between the past and future of the VS inputs  $I_{future:limit}$  is

$$I_{future:limit} = I(curr_{past}; curr_{future}) = I(curr_t; curr_{t+\Delta t})$$

$$= \iint_{curr_t, curr_{t+\Delta t}} p(curr_t) p(curr_{t+\Delta t} | curr_t) \log_2 \frac{p(curr_{t+\Delta t} | curr_t)}{p(curr_t)}. \quad (2)$$

219 This is also the mutual information between the past and future input (the dendritic current) and  
 220 defines the total interdependence of the current with itself in time.

221 Similar to  $I_{future:limit}$ , we also define the information encoded by the axonal voltage of the VS  
 222 network from its own input as

$$I_{future:in} = I(V_{past}; curr_{future}) = I(V_t; curr_{t+\Delta t}). \quad (3)$$

223 This is the predictive information between the output axonal voltage and the future input current,  
 224 which again we are using as a proxy for future stimulus. Causality dictates that the past axonal  
 225 voltage can only obtain information about the future current from the past current, therefore  
 226  $I_{future:limit}$  is an upper bound on  $I_{future:in}$ . Here, we explore what network wiring features support  
 227 the maximal transmission of the correlation structure in the input current onto the output axonal  
 228 voltage of the VS network.

229 As shown in *Figure 2*, axonal gap junctions are necessary for the system to encode the maximal  
 230 amount of predictive information about the input current. Namely, the  $I_{future:in}$  (shown in pink) only  
 231 approaches  $I_{future:limit}$  (shown in green) when gap junctions are present to neighboring VS axons.



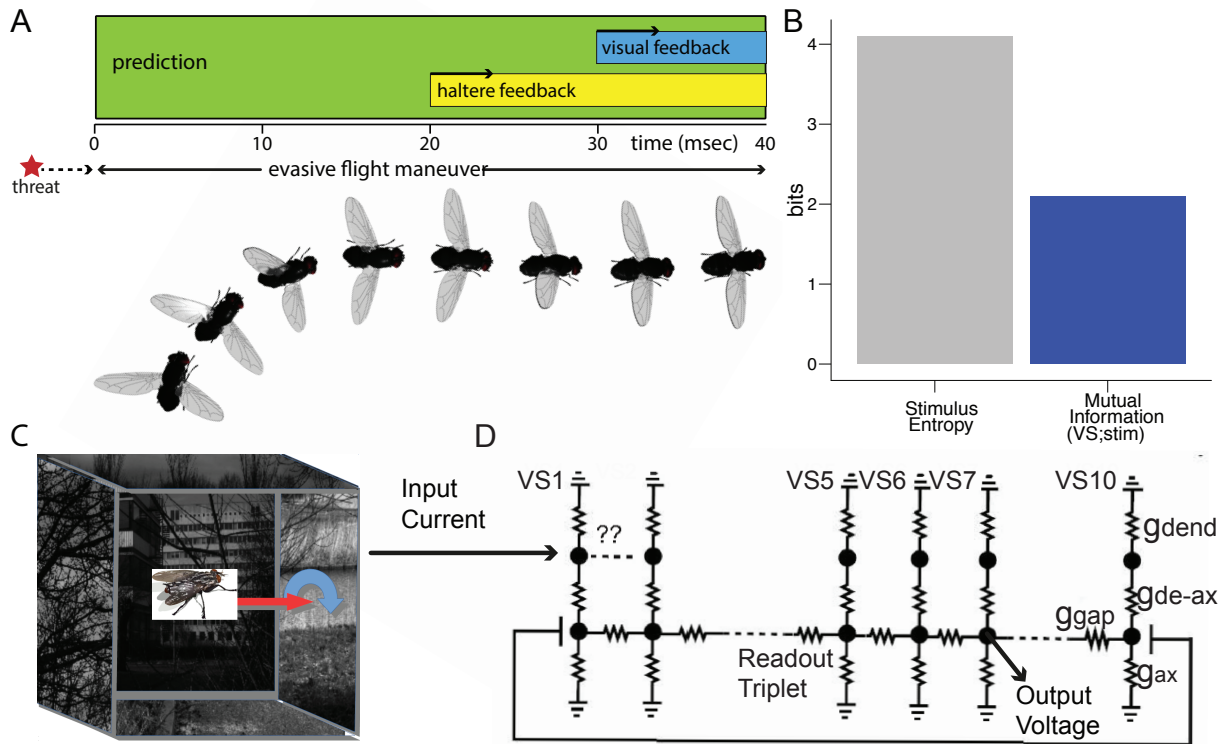

**Figure 1. Predictive information is the dominant information source about visual inputs during evasive flight maneuvers.** (A) Upon emergence of a threat (shown as the red star, dashed line represents the visual-motor delay of 60ms from the onset of threat to the start of the evasive maneuver), the fly performs an evasive maneuver by changing its heading through a banked turn. During the evasive maneuver, visual predictions can provide motion information throughout the entire duration, i.e., without delay (shown as the green zone), whereas the haltere feedback is only available after 20ms (shown as the yellow zone) and the visual feedback is only available after 30ms (shown as the blue zone). (B) This histogram compares how much information the visual prediction (shown in blue) can encode about the stimulus during the evasive maneuver with the stimulus entropy (shown in gray). We use the stimulus distribution at  $\Delta t = 10ms$  into the evasive maneuver to compute this entropy. Its distribution is shown in *Figure 1-Figure Supplement 1A*. Note that the VS output contains almost half of the future stimulus entropy. (C) Schematic depiction of the visual stimuli for the simulation, recompiled from (Wang et al., 2017). Six natural images (five are shown here, with one excluded to reveal the fly's viewing perspective) were randomly selected from the van Hateren dataset (van Hateren, 1992); each image was patched onto a different face of a cube. Assuming that the fly is located in the center of this cube, we obtain the visual experience of the fly's ego-rotational motion by rotating this cage around a particular motion direction shown by the dark blue arrow. We then project the moving natural scene cage to  $\sim 5,500$  local motion detectors (LMD), which are randomly distributed on the fly's retina. The responses of these LMDs are then integrated as the input current to the VS network (shown as arrow to D). (D) A biophysically detailed model of the VS network, based on known neural circuitry (Hagg and Borst, 1996; Haag and Borst, 2004). We highlight the outputs to the neck motor center here, the axonal voltages of the VS 5-6-7 triplet. This is the only known readout that directly connects to motor pathways.

**Figure 1-Figure supplement 1.** Stimulus distributions for different time steps during the evasive maneuver.

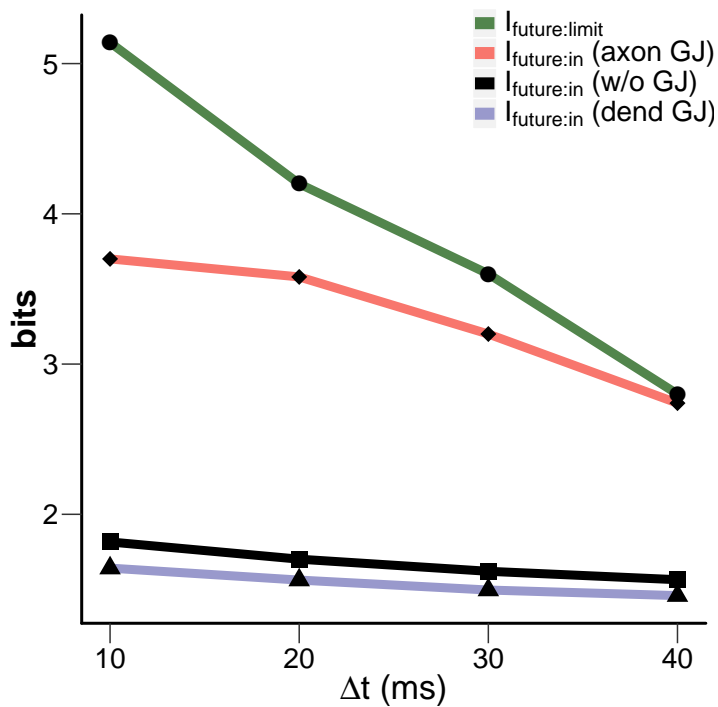

**Figure 2. The capacity of the VS network to encode predictive information varies with the anatomical locations of the gap junction between VS cells.** The predictive information about the future input current,  $I_{future:in}$  encoded in four different schemes: 1) the past dendritic input current (in green, this is the limit  $I_{future:limit}$ . It is also the upper bound of  $I_{future:in}$ ), 2) the past axonal voltage when the gap junctions are present between VS axons (pink), 3) when the gap junctions are present between VS dendrites (purple) and 4) in the absent of gap junctions (black). All Gap junctions = 1000 nS for both settings when they are present. Only their locations differ, i.e., axon vs. dendrite. Note that when the gap junctions are present between VS cell axons, the output voltages preserve almost the entire amount of the predictive information available at the inputs (red). (See details in Methods and Materials.)

232 The other two configurations of gap junctions, i.e., no gap junctions or gap junctions at the dendrites  
 233 (shown in black and purple, respectively), cannot encode as much predictive information. Previous  
 234 work had shown that the axonal gap junctions implement an electrotonic segregation that results  
 235 in the broadening of receptive fields at the axonal terminal of the VS cells, for constant rotational  
 236 motion (Cuntz *et al.*, 2007). Here, we further determine that such electrotonic segregation supports  
 237 maximal predictive encoding in a realistic behavioral context.

### 238 The VS network is near-optimal in predicting its own future input.

239 All of the information encoded by the VS network comes from its sole input current,  $curr_{past}$ . To  
 240 quantify the efficiency of encoding, we not only need to quantify the benefit (i.e., the  $I_{future:in}$ ), we  
 241 also need to quantify the cost, which is how much the axonal voltage encodes about its input (at  
 242 the same time in the past). We define this as another mutual information quantity,

$$I_{past:in} = I(V_{past}; curr_{past}) = I(V_t; curr_t). \quad (4)$$

243 Comparing  $I_{past:in}$  and  $I_{future:in}$  where the past is at time  $t$  and the future at  $t + \Delta t$ , we can ask  
 244 formally whether the VS network encodes as much as predictive information as possible, using  
 245 the information bottleneck framework (Tishby *et al.*, 2000). Given the amount of information the  
 246 axonal voltage encodes about the past sensory input, what is the maximal amount of information  
 247 it can encode about the future input? Such an optimum  $I_{future:in}^*(I_{past:in})$  traces out a bound (the  
 248 dark blue line) in Figure 3 as a function of  $I_{past:in}$ . It is the maximal possible predictive information  
 249 at each level of compression,  $I_{past:in}$ . For encodings with the same  $I_{past:in}$ , those approaching the  
 250 bound are optimal.

251 The known circuitry of the VS network allows us to probe two coupled questions: 1) What is the  
252 predictive efficiency (based on the past encoding) and 2) What is the predictive capacity (encoding of  
253 the past input only to predict the future input) of the VS network, given different readout encoding  
254 architectures?

255 The predictive capacity of the VS network for its own future inputs is near-optimal, as shown in  
256 **Figure 3A**, the axonal voltages of the VS network encode  $I_{future:in} = 3.49 \pm 0.1$  bits for future inputs at  
257  $\Delta t = 10ms$  (the beginning of the banked turn). Considering that optimum is  $I_{future:in}^*(I_{past:in}) = 3.59$   
258 bits, using axonal voltages of all VS cells capture  $I_{future:in}/I_{future:in}^* = 97.2\%$  of the optimal predictive  
259 information. Such optimality is also present for predicting visual inputs at  $\Delta t = 40ms$  (the counter  
260 banked turn segment, corresponding to the end of the evasive maneuver, as shown in **Figure 3B**).

261 Similarly, using only the axonal voltages from the triplets, prediction of the entire VS network's  
262 future input is also close to optimal. We show this as the cross in red, for predicting both the future  
263 right after the start of the evasive maneuver and towards the end of the evasive maneuver in  
264 **Figure 3A** and **Figure 3B**, respectively. For example, all encodings based on outputs of triplets reach  
265  $I_{future:in} = 2.89 \pm 0.36$  bits while their respective physical limits are  $3.07 \pm 0.24$  bits in **Figure 3A**. This  
266 suggests that all triplets achieve  $89.8 \pm 1.5\%$  efficiency in encoding predictive information about the  
267 inputs  $I_{future:in}/I_{future:in}^*$ .

268 However, the near-optimality of the triplets are still inferior to that obtained by having the axonal  
269 voltages of all VS neurons in the network (89.8% vs. 97.2%). All encodings based on triplets contain  
270 somewhat less absolute predictive information. The VS network achieves its best trade-off efficiency,  
271 the middle shoulder section between the quickly-rising phase and the diminishing-returns-phase of  
272 the bound  $I_{future:in}^*(I_{past:in})$  in **Figure 3B**, for encoding stimuli towards the end of the flight maneuver.  
273 Because the prediction of its own input is only a proxy of prediction for future stimulus, inferior  
274 optimality in predicting its own input does not necessarily map to the same degradation in the  
275 prediction of the future stimulus. In the next section, we explore how much this efficiency for  
276 predicting its own future input affects the encoding of future visual stimulus.

### 277 **The triplet architecture selectively encodes predictive information about the fu-** 278 **ture stimulus.**

279 The triplet readout encoding architecture retains close to all of the available predictive information  
280 about the future stimulus available to the VS network at its input. Using the VS 5-6-7 triplet as an  
281 example (darker color bars in **Figure 4A**), we can see that triplets capture most of the available  
282 predictive information about the future stimulus ( $I_{future:stim}$ , defined in Section 1 of the Results).  
283 Because downstream pathways of the VS network only readout from triplets, the VS network  
284 appears to use a two-step strategy to optimize this readout: it first efficiently represents correlations  
285 within its own past and future input, i.e.,  $I_{future:in}$ , at its output; then selects components within  
286 that output that are relevant for predicting the future stimulus,  $I_{future:stim}$ . This is possible because  
287 correlations coming from events in the visual world, such as the movement of large objects or the  
288 full-field background movement have a different temporal structure (e.g. longer correlation times)  
289 than those internal to the brain.

290 **Figure 4B** shows that all triplets are near-optimal in encoding the predictive information about  
291 the future stimulus. Interestingly, such optimality is close to the niche region where the predictive  
292 information just begins to saturate (such optimality is also present for prediction of the distant  
293 future, i.e.,  $\Delta t > 10ms$ , results not shown). Considering that the VS 5-6-7 triplet encodes nearly the  
294 same information about the future stimulus compared to the VS network (**Figure 4A**), the main  
295 benefit of using triplet is compression: despite encoding less predictive information about its own  
296 input, the VS triplet readout encoding retains nearly as much as possible about the future statistical  
297 structure of the ongoing maneuver, discarding information predictive of the less-behaviorally-  
298 relevant intrinsic dynamics of the inputs, themselves.

299 Although all triplets encode similar amounts of information about the future stimulus (the  
300 standard deviation of the  $I_{future:stim}$  amongst all 120 triplets is just 0.1 bits), the particular triplet



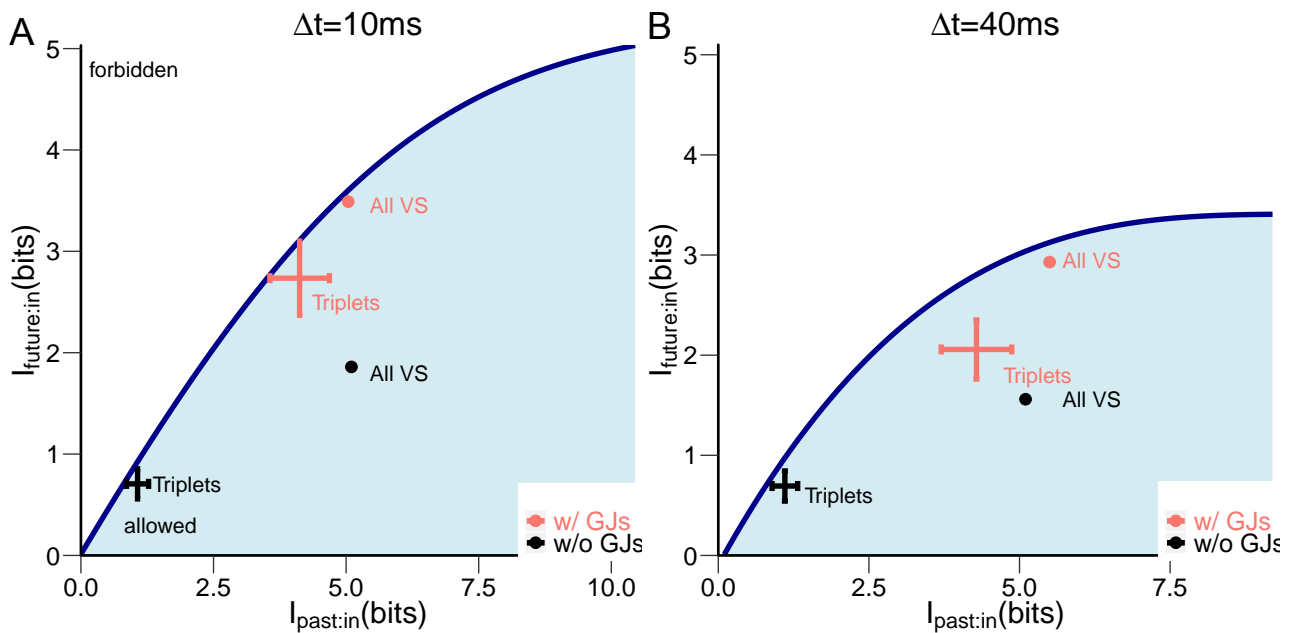

**Figure 3. Near-optimal prediction of the input to the VS network.** (A) The encoding of predictive information about the future current input to the VS network is near-optimal 10ms after the evasive maneuver starts ( $\Delta t = 10ms$ ). Such performance is present for using both the entire VS network and the triplets. The dark blue curve traces out optimum encoding of future input to the VS network given varying amounts of information retained about the past input (also see Methods and Materials). This curve also divides the plane into allowed (blue shaded region) and forbidden regions. No encoding can exist in the forbidden region because it cannot have more information about its future inputs than the input correlation structure allows, given causality and the data processing inequality. In addition, the maximal amount of information (shown as the highest point of the information curve) that is available as predictive information is limited by the correlation structure of the input (current), itself. We then plot the amount of information the axonal voltages of VS network (we show with axonal gap junctions in pink and without gap junctions in black) encode about the future input (the input current at time  $t + \Delta t$ ) versus the information they retain about the past input (the input current at time  $t$ ) (with all 120 triplets (crosses) and the whole network (circle)). The information efficiency, compared to the bound, contained in a particular encoding scheme corresponds to a single point in this  $I_{past:in} - I_{future:in}$  plane, which shows how much information it encodes about the past input vs. how much it encodes about the future. A particular VS encoding could occupy any point within the blue shaded region, but those that get close to the bound  $I_{future:in}^*(I_{past:in})$  for a particular  $I_{past:in}$  are the maximally informative predictors of the future input. (B) Similar to A, but for prediction of the distant future:  $\Delta t = 40ms$ , corresponding to the stimulus at the end of evasive maneuver.

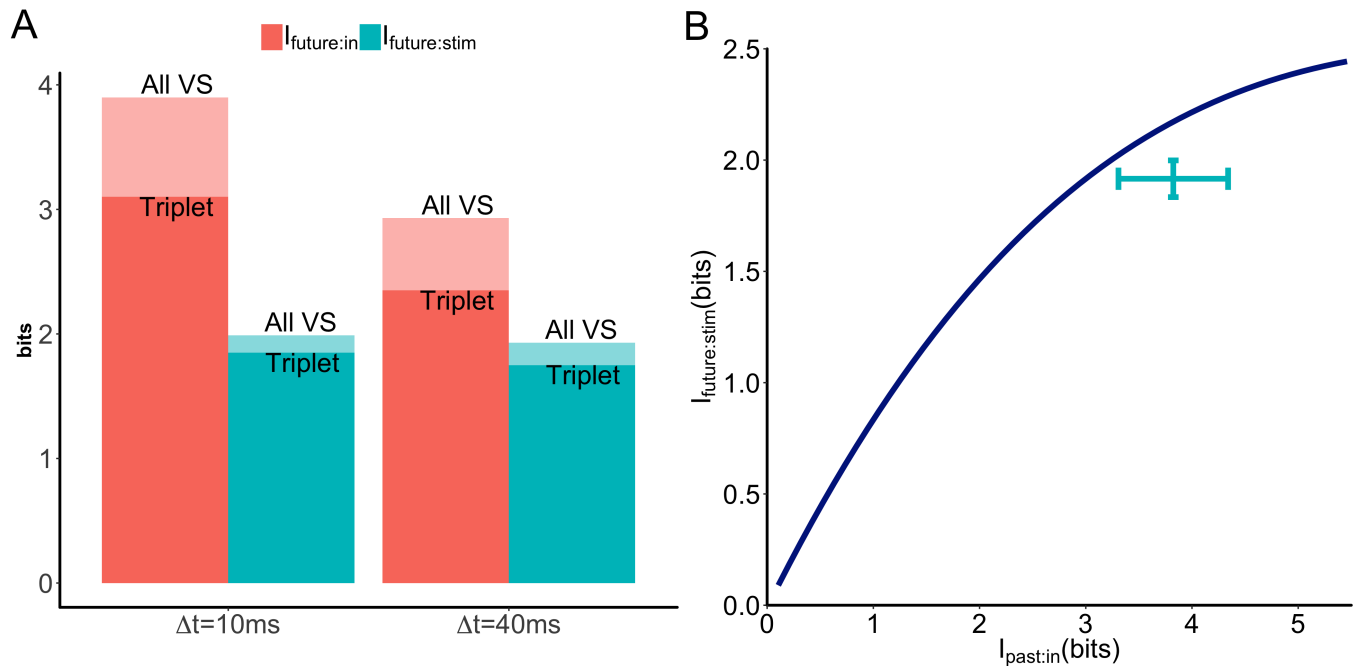

**Figure 4. Encodings based on the axonal voltages of triplets are near-optimal in predicting the future stimulus.** (A) Histogram showing that although the VS triplets encode less predictive information compared to a combination of all VS axonal voltages (shown in red), the triplets (we use the VS 5-6-7 triplet as an example here) encode nearly as much information *about the future stimulus* (shown in cyan) as the whole VS population. Here we show the comparison for the immediate future stimulus after the onset of the evasive maneuver,  $\Delta t = 10ms$ . Similar relationships also hold for the more distant future stimuli, e.g.  $\Delta t > 10ms$  (not shown). (B) Similar to **Figure 3A**: The encoding of predictive information for the future stimulus 10ms after the start of the evasive maneuver ( $\Delta t = 10ms$ ). The dark blue curve traces out the optimum encoding of the future stimulus given varying amounts of information retained about the past input. The cyan cross corresponds to how much information each of all possible 120 triplets encode about the future stimulus vs. how much information they retain from the past input.

**Figure 4–Figure supplement 1.** How much a triplet readout encoding retains from the past input vs. how much that information is about the future stimulus (out of the information about their own future input), for all 120 possible triplets.

301 connecting to the neck motor center, the VS 5-6-7, is one of the better choices in terms of how much  
 302 information about the future stimulus it packs into its prediction of the future input (**Figure 4–Figure**  
 303 **Supplement 1**). The most efficient triplet is VS 1-2-3. However, if we factor in wiring constraints,  
 304 linking the output from VS 5-6-7 to a downstream dendritic arbor in the descending neurons for the  
 305 neck motor center requires a much shorter wiring length compared to the peripheral location of  
 306 the VS 1-2-3 triplet (VS cells are numbered according to their locations along the anterior-posterior  
 307 axis, VS 5-6-7 are central in the compound eyes). It is possible that the minimization of wiring  
 308 length (**Cuntz et al., 2009**) is important in selecting the simultaneously most predictive and most  
 309 resource-efficient encoding.

310 Here we show that the VS 5-6-7 triplet is successful in retaining nearly all of the predictive  
 311 information about the future stimulus compared to that encoded by the entire VS network. This  
 312 result also clarifies that the predictive information encoded by the VS network is compressible:  
 313 the VS 5-6-7 triplet successfully reformats the predictive information from 20 dendrites/axons (10  
 314 VS cells from both compound eyes combined) into six axons (the axons of VS 5-6-7 from both  
 315 compound eyes combined). In the next section, we investigate how the stimulus representations  
 316 vary based on either the entire VS network or the VS 5-6-7 triplet. We do this to understand a) what  
 317 kind of computation is possible via the encoding of near optimal predictive information, and b) how  
 318 the VS 5-6-7 triplet reformats this near-optimal prediction.

319 **Predictive information encoded by the VS network provides fine-scale discrimina-**  
320 **tion of nearby stimuli.**

321 Comparing the stimulus representations encoded by the entire VS network and the VS 5-6-7 triplet  
322 is challenging. No direct comparison can be made between representations of different dimensions  
323 (20-D based on the entire VS network and 6-D based on the VS 5-6-7 triplet). We can, however,  
324 make use of our information plane analysis and fact that both schemes encode similar amount of  
325 predictive information. Points at the same y-value or similar y-values in the information plane have  
326 the same dimensionality in their compressed representations,  $Z$  (Tishby et al., 2000). Therefore, to  
327 compare encoding schemes, we can explore the structure of the encoding  $Z$ . While we were able to  
328 compute information quantities in  $Z$  as shown above, it is more complicated to derive the structure  
329 of the mapping to  $Z$ , itself. Thankfully, recent work in machine learning and computational  
330 neuroscience guides the way forward. We can approximate the structure of the optimal encoding by  
331 finding a variational approximation (Alemi et al., 2016; Higgins et al., 2017; Chalk et al., 2016) to the  
332 information bottleneck (VIB) problem. It has been shown that this approximation is closely related  
333 to the loss function used to train variational autoencoders (Kingma and Welling, 2013). The VIB is a  
334 generative learning framework. Given pairs of the inputs and outputs, it generates a latent feature  
335 space whose dimensions are predictive features from the input to the output (Figure 5–Figure  
336 Supplement 1). One can then project the input into this latent feature space to obtain the predictive  
337 representation of the output. Therefore, by using the axonal voltage as input and the future input  
338 current as output (During the evasive maneuver, the VS network does not have direct access to  
339 the visual input. Instead, it uses the correlations between its past and future inputs induced by the  
340 stimulus as a proxy for the stimulus correlations, themselves) in training a VIB, we can explore the  
341 representation of the future stimulus encoded by the optimally predictive VS network at a fixed level  
342 compression (see Materials and Method). To allow for a direct comparison, we keep the dimension  
343 ( $D = 2$ ) of the latent feature space to be the same while changing the input, using either the axonal  
344 voltages of the entire VS network, or those of the VS 5-6-7 triplet.

345 The representations of the future stimulus generated by the VIB (Figure 5), reveal that the  
346 predictive information encoded by the VS network supports fine-scale discrimination of the input  
347 motion direction. We obtain these predictive representations in two steps: first we train the VIB  
348 to generate a latent feature space that maps the input (the axonal voltages of the VS network)  
349 to the future input current. Next, we project input voltages that correspond to the same future  
350 stimulus onto this latent space. We can label these points in the latent space by their future  
351 stimulus value, and repeat this procedure for several different stimulus values. We can visually  
352 and computationally examine how overlapping or distinct these maximally predictive stimulus  
353 clusters are in the latent space of the VIB. Based on these predictive stimulus representations,  
354 we can understand what is being computed during the evasive maneuver. The Figure 5A shows  
355 a predictive representation for stimuli with different degrees of clockwise roll and up-tilt pitch  
356 (i.e., their corresponding directional vectors are located in the 1st quadrant in the fly's coronal  
357 plane). The Figure 5B shows a similar predictive representation using the axonal voltages of the VS  
358 5-6-7 triplet as input. In both predictive representations, the clusters corresponding to different  
359 stimuli are distinguishable. Such discrimination also applies to stimuli combining counter-clockwise  
360 roll and up tilt, i.e., corresponding to vectors within the 4th quadrant of the fly's coronal plane  
361 (Figure 5C for using the entire VS network as input and Figure 5D for using the VS 5-6-7 triplet as  
362 input, respectively). However, these predictive representations cannot discriminate stimuli with  
363 vastly different roll or pitch directions, i.e., belonging to different quadrants: there is substantial  
364 overlap if we overlay these predictive representations, e.g. the cluster corresponding to 270° (shown  
365 in magenta in Figure 5C) will entirely cover the cluster corresponding to 19° (also shown in magenta,  
366 but in Figure 5A). The same overlap is also present in Figure 5B and Figure 5D. Therefore, both the VS  
367 network and the VS 5-6-7 triplet support a similar fine-scale discrimination between closely-related  
368 stimuli. This similarity agrees with our previous result (Figure 4) that both the VS network and the VS

369 5-6-7 triplet, as well as their respective VIB approximations (*Figure 5–Figure Supplement 4*), retain  
370 almost the same amount of predictive information about the future stimulus.

371 Interestingly, such discrimination preferentially disentangles nearby stimuli. For example, a  
372 pair of stimuli ( $56^\circ$  and  $67^\circ$ , shown in *Figure 5–Figure Supplement 4A* and *Figure 5–Figure Supple-*  
373 *ment 4B*) that are just 10 degrees apart are mapped to distinct, well-separated clusters in the latent  
374 space of the VIB. Conversely, another pair ( $19^\circ$  and  $37^\circ$ ) that are farther apart share some overlap  
375 (*Figure 5A* and *Figure 5C*). The VS 5-6-7 triplet preserves this fine scale discrimination (*Figure 5B* and  
376 *Figure 5D*) while compressing the readout. During the evasive maneuver, this fine-scale discrimina-  
377 tion can aid in fine tuning of banking, allowing the fly to carefully adjust its heading change based  
378 on the input threat. We hypothesize that the predictive information encoded by the VS network  
379 can help the downstream neck motor center to actively control the evasive maneuver. Because  
380 the predictive representations generated by VIB contain about 75% of the predictive information  
381 in their inputs (*Figure 5–Figure Supplement 2*), this result provides a lower estimate of what the  
382 biological networks can encode: because both the VS network and the VS 5-6-7 triplet encode more  
383 predictive information than their respective VIB approximations, they should be able to perform at  
384 or better in the fine-scale discrimination achieved by the VIB's, as shown in *Figure 5*.

385 Even with a representation that retains all of the stimulus information in the input to the  
386 VS network, one cannot discriminate stimuli in vastly different directions. We construct such a  
387 representation based on the instantaneous input current of the present stimuli. These input  
388 currents contain 2.44 bits of the stimulus information at the same point in time, i.e. without  
389 prediction forward in time. This information is higher than that available via predictive information  
390 encoding of the past input current (2.1 bits, shown as the red bar in *Figure 5–Figure Supplement 2*).  
391 The first two principal components (PC) of the input current retain nearly all available stimulus  
392 information, so we ask whether disparate stimuli can be disentangled in this subspace of the  
393 instantaneous stimulus representation. Hence, we obtain a representation retaining all stimulus  
394 information by projecting all VS input currents into these first 2 PCs. We find that there still exists  
395 substantial overlaps between stimuli (*Figure 5–Figure Supplement 3*), e.g. the cluster of  $19^\circ$  in  
396 magenta almost covers the entire cluster of  $247^\circ$  in light green (*Figure 5–Figure Supplement 3A*).  
397 This shows that the input to the VS network can only support fine-scale discrimination, whether  
398 an instantaneous readout or predictive readout. This also means that based on prediction, the VS  
399 network can only perform fine-scale discrimination. Therefore, it is possible that the integration at  
400 the neck motor center from multiple sources (VS network, haltere and prosternal organs (*Buschbeck*  
401 *and Strausfeld, 1997*) combines information from other pathways to discriminate stimuli with larger  
402 direction differences.

## 403 Discussion

404 Here, by focusing our analysis of the fly's neural code for a key survival strategy, the evasive  
405 flight maneuver, we have shown that the VS network can encode predictive information near-  
406 optimally. A subpopulation readout mechanism, based on triplets of VS cells, further compresses  
407 the representation of that predictive information. This compression trades off local input prediction  
408 with the prediction of the future stimulus: while it encodes the future input somewhat sub-optimally,  
409 it retains the more behaviorally important predictive stimulus information at higher fidelity, in all  
410 triplets. The encoding of predictive information has a concrete behavioral goal: it enables fine-  
411 tuning of motion discrimination during the evasive maneuver.

412 Combining these observations, the fly brain satisfies an overarching computational goal of  
413 effectively guiding evasive flight trajectories through visual prediction at both levels of input filtering  
414 (via axonal gap junctions) and output reformatting (via subpopulation readout based on triplets). By  
415 next identifying that the predictive representations of future stimuli are best at enabling fine-scale  
416 discrimination of nearby stimuli, we have shown how structure maps to function in this motion  
417 sensing system. In addition, we have shown that behaviorally relevant features of the stimulus are  
418 faithfully encoded via circuit mechanisms at the sensory end of the arc from sensation to action.

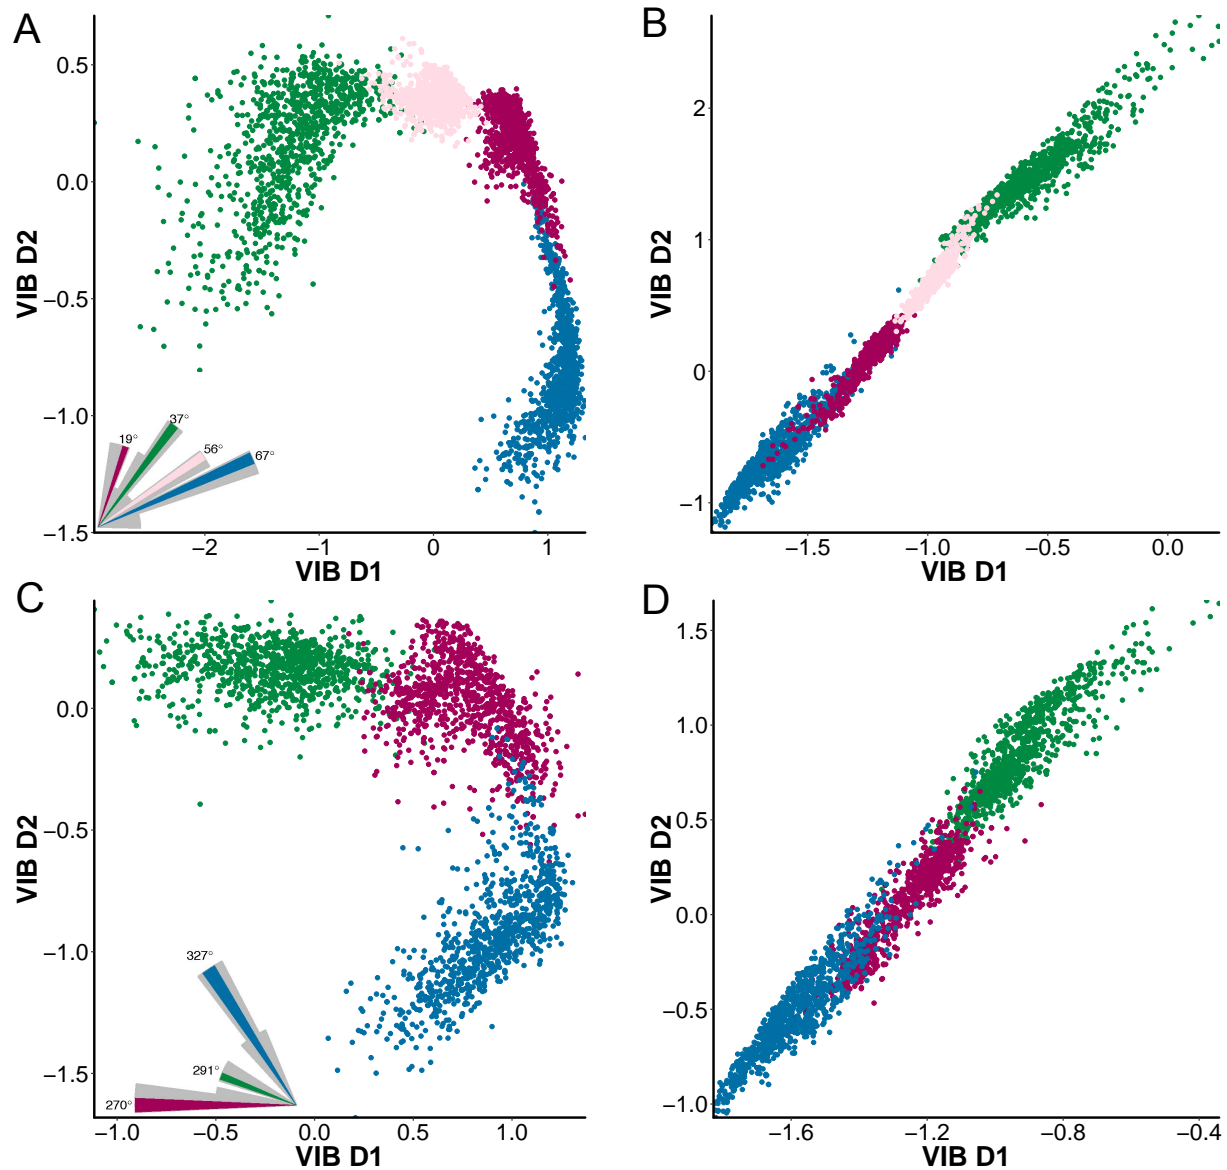

**Figure 5. The predictive information encoded by the VS network supports fine scale discrimination of the future stimulus.** (A) The predictive representation of four future stimuli in the same quadrant of roll and pitch, e.g. an up-tilt and a clockwise roll. This representation maps the axonal voltage of the entire VS network to the future stimulus through a latent feature space. The dimensions in this latent feature space (shown as VIB D1 and VIB D2) are VIB-learned predictive features based on the output of the VS network. All stimuli correspond to vectors within the 1st quadrant of the fly's coronal plane. The inset shows a polar histogram in grey and the four selected stimuli in color. (B) Similar to A but using the axonal voltages of the VS 5-6-7 triplet. (C) Similar to A, but the motion stimuli are all counter-clockwise roll and up-tilt, corresponding to vectors in the 4th quadrant (between 270° and 360°) of the fly's coronal plane. (D) Similar to C, but obtained using the axonal voltages of the VS 5-6-7 triplet as the VIB input.

**Figure 5-Figure supplement 1.** Network schematic for the variational approximation of the information bottleneck solution (VIB)

**Figure 5-Figure supplement 2.** Predictive information for the future stimulus 10ms after the evasive maneuver starts ( $\Delta t = 10ms$ )

**Figure 5-Figure supplement 3.** The input to the VS network only supports local discrimination.

**Figure 5-Figure supplement 4.** The predictive information encoded by the VS network preferentially discriminates nearby stimuli.



419 This suggests that behavioral goals sculpt neural encoding even at the earliest stages of sensory  
420 processing.

421 our work predicts a novel sensory-motor pathway between the visual system and a visually  
422 gated motoneuron of wing steering muscles. Evasive maneuvers consist of rapid banked and  
423 counter-banked turns. These rapid turns require elevated wing kinematics, including stroke am-  
424 plitude and frequency (*Heide and Götz, 1996*). Previous work showed that a motoneuron of wing  
425 steering muscles, e.g., the second basalare motoneurons (M.b2) in both blowfly and drosophila, are  
426 responsible for initiating these elevated wing kinematics (*Tu and Dickinson, 1996; Lehmann and*  
427 *Gotz, 1996*). However, little is known about these neurons other than that they can be switched  
428 on and off by visual input (*Dickson et al., 2006; Lindsay et al., 2017*). Our work shows that visual  
429 prediction can reach these motoneurons at the beginning of evasive maneuvers. This makes visual  
430 prediction a suitable input source that may activate these motoneurons at the beginning of rapid  
431 banked turns.

432 Although our results show that the near-optimal prediction is present in the VS network of the  
433 blowfly, further investigation is necessary to identify whether this generalizes to other dipterans.  
434 First, not all dipterans use VS cells for flight control, e.g. predatory flies like *Holcocephala* and *Efferia*  
435 do not have VS cells. Instead, they use extra, complementary horizontal motion sensitive (HS)  
436 cells to compute rotational motion (*Buschbeck and Strausfeld, 1997*); second, other dipterans may  
437 have flight behaviors non-existent in blowflies, i.e., stationary hovering or ballistic interception. These  
438 maneuvers provide drastically different selective pressure on their respective tangential neurons.  
439 However, all dipterans' lobula plate tangential neurons are strongly lagged with respect to their  
440 behavioral timescales (e.g. the reaction time of robber flies are even faster for prey capture, around  
441 10-30ms, and their sensory processing delay is around 18-28ms) (*Fabian et al., 2018*).

442 Gap junctions are prevalent throughout the brain in many species (*Connors, 2017; Marder,*  
443 *1998*). In vertebrate visual systems, the retina also encodes predictive information near-optimally  
444 to potentially circumvent sensory processing delays (*Palmer et al., 2015; Sederberg et al., 2018*).  
445 Initial evidence supports the notion that gap junctions are a key circuit element in improving signal  
446 transmission in retina: for example, gap junctions between directionally selective ganglion cells in  
447 the mouse retina result in lag-normalization (*Trenholm et al., 2013*), and the gap junctions present  
448 in cones and bipolar cells improve the signal-to-noise ratio in their respective outputs (*Ala-Laurila*  
449 *et al., 2011*). Gap junctions can also rapidly regulate chemical synapses and improve sensitivity  
450 to correlated signals (*Jacoby et al., 2018*). When processing stimuli with correlations between  
451 the past and the future (e.g. predictable motion), these mechanisms can support prediction to  
452 compensate for delays. In the central nervous system, gap junctions are versatile enough to support  
453 flexible hierarchical information processing in cortical circuits, as hypothesized in (*Heeger, 2017*).  
454 The ubiquitous evolutionary pressure to perform efficient prediction may shape nervous systems  
455 through this common circuit motif.

456 The brain carries out flexible, robust, and efficient computations at every moment as an or-  
457 ganism explores and interacts with the external world. These computations are only possible  
458 through versatile mechanisms that operate under realistic behavioral constraints. We have shown  
459 that optimizing the transmission of predictive information in sensing systems is a useful way to  
460 interrogate the neural code. Given the presence of predictive information in sensory systems that  
461 evolved independently (*Palmer et al., 2015*), our work supports the idea that predictive information  
462 may very well be a fundamental design principle that underlies neural circuit evolution. While  
463 we have dug into the specific mechanisms and representations that support this kind of efficient  
464 prediction for fast, natural and behaviorally critical motion processing in the fly visual system, the  
465 lessons learned may apply to a much larger class of neural sensing systems.

## 466 **Methods and Materials**

### 467 **Self-motion stimuli for evasive flight maneuvers**

468 We obtain self-motion stimuli from a large dataset of evasive flight maneuvers in drosophila  
469 published in (Mujires *et al.*, 2014). This dataset contains 82 traces of evasive trajectories when  
470 the flies face looming targets from all possible angles in their left visual field. All traces contain  
471 motion information (e.g., direction, velocity, etc.) from the emergence of the threat to the end of  
472 the evasive maneuver. In this dataset, the evasive flight trajectories are aligned at the beginning of  
473 the maneuver. The duration of the evasive trajectories vary between 10-40ms, with 65 out of 82  
474 flights as long as 40ms. We chose this dataset for two reasons: a) its sample rate (7500 fps) allows  
475 us to trace the activity of the VS network at the millisecond scale; b) it contains threats approaching  
476 the fly from angles spanning a full 180°, providing a well-sampled collection of the fly's behavioral  
477 repertoire.

### 478 **Simulation of the model VS network**

479 Our simulation uses a biophysically realistic simplified model of the VS network based on a recon-  
480 struction introduced in (Cuntz *et al.*, 2007). This reconstruction models each VS cell with hundreds  
481 of dendritic compartments based on image stacks obtained by two-photon microscopy. Meanwhile,  
482 it implements the chain-like circuitry of the VS network by using both a) resistances connecting  
483 neighboring cells as axonal gap junctions (Haag and Borst, 2004, 2005); b) the negative conductance  
484 between the VS1 and the VS10 to account for the reciprocal innhibition. (Haag and Borst, 2007)

485 Compared to the detailed reconstruction, the simplified, biophysically realistic model introduced  
486 in (Weber *et al.*, 2008) reduces all dendritic compartments into a single compartment while keeping  
487 other components intact. In the simplified model, an individual VS cell is represented by one den-  
488 dritic compartment and one axonal compartment, respectively. All its parameters were determined  
489 by a genetic algorithm (Weber *et al.*, 2008) so that this simplified model behaves roughly the same  
490 as the real VS network when given the same current injection (Haag and Borst, 2005, 2004).

491 Both the dendritic and axonal compartments have their own conductances ( $g_{dend}$  and  $g_{ax}$ ,  
492 respectively) and a connection conductance between them (shown as the  $g_{de-ax}$ ). This VS network  
493 model defines the receptive field (RF) of these dendritic compartments as a 2-D Gaussian with  
494  $\sigma_{azimuth} = 15^\circ$  and  $\sigma_{elevation} = 60^\circ$ , tiling along the anterior-posterior axis. Input from local motion  
495 detectors within the receptive field of an individual dendrite are integrated into the input current  
496 (shown as the arrow between **Figure 1C** and **Figure 1D**). The neighboring axonal compartments  
497 of different VS cells are connected by gap junctions (shown as  $g_{gap}$ ), whereas VS1 and VS10 are  
498 connected by inhibitory chemical synapses. In our simulation, we set all conductance magnitudes  
499 using the same method as in (Weber *et al.*, 2008). Based on experimental findings from (Hagg and  
500 Borst, 1996), we vary the magnitude of the GJ conductance between 0 and 1  $\mu S$ .

501 In every simulation, we first generate the pseudo-3D visual "cube" (**Figure 1C**) representing the  
502 environment to which our model fly visual system responds, by randomly selecting six images from  
503 the van Hateren dataset. Next, we rotate this cube according to the rotational motion during evasive  
504 maneuvers recorded in (Mujires *et al.*, 2014). Following the protocol in (Trousdale *et al.*, 2014), we  
505 sample the rotational motion at a  $\Delta t = 1ms$  interval, but integrate the above two equations at a  
506 smaller time step of 0.01ms to guarantee numerical accuracy. This yields the optic flow pattern  
507 that we then project into the 5000 local motion detectors (LMD) in our model visual system. Each  
508 LMD contains two subunits that differ by  $2^\circ$  in elevation. They are randomly distributed in a sphere  
509 mimicking the visual range of the fly. Each VS dendrite takes as input the output of the LMDs that  
510 fall into its respective field to generate the input current to the model VS network. We then use the  
511 temporal average of the resulting axonal voltage  $V_{past} = 1/T \int V_{past}(t)dt$ . For the voltage just before  
512 the start of the evasive flight maneuver, we use  $t = -10 \sim 0ms$ , because 0ms is the start of evasive  
513 maneuver. For each of the 65 evasive traces that lasted a full 40ms, we simulated 10,000 randomly  
514 generated natural scenes to obtain samples of the input (current arriving at dendrites) and output

515 (axonal voltages) for subsequent analysis.

### 516 **Efficient encoding of predictive information**

517 To predict the future input motion, the only input the VS network has is its dendritic input at past  
 518 times up to the present, i.e.,  $curr_{past}$ . Ideally, the VS network output represents the future motion  
 519 in a specific form,  $Z$ , following the optimal encoding dictated by the solution to our information  
 520 bottleneck problem. The bottleneck minimizes how much the representation retains about the past  
 521 input  $I(Z; curr_{past})$  and maximizes how much it encodes about the future input i.e.,  $I(Z; curr_{future})$ .  
 522 Formally, such encoding  $Z$  solves the following variational problem, prediction of its own input:

$$\mathcal{L}_{p(Z|curr_{past}),\beta} = I_{past:in} - \beta I_{future:in} \quad (5)$$

523 where  $\beta$  is the trade-off parameter between compression of information about the past, and  
 524 retention of information about the future sensory input (we switch to  $I_{future:stim}$  when we look at the  
 525 prediction of the future stimulus, as shown in Section 4 of the Result). For each  $I_{past:in}$ , there exists  
 526 an optimal  $I_{future:in}^*(I_{past:in})$  which is the maximum  $I_{future:in}$  possible for a specified  $I_{past:in}$  determined  
 527 by the statistics of the sensory input, i.e.,  $curr_{past}$ , itself.

528 We use the following iterative (the Blahut-Arimoto algorithm (**Blahut, 1972**)) algorithm to find  $Z$   
 529 that optimizes **Equation 5**:

$$p_t(Z|curr_{past}) = \frac{p_t(Z)}{Z(curr_{past}, \beta)} \exp[-\beta \sum_{curr_{future}} p(curr_{future}|curr_{past}) \log \frac{p(curr_{future}|curr_{past})}{p_t(curr_{future}|Z)}] \quad (6)$$

$$p_{t+1}(Z) = \sum_{curr_{past}} p(curr_{past}) p_t(Z|curr_{past}) \quad (7)$$

$$p_{t+1}(curr_{future}|Z) = \sum_{curr_{past}} p(curr_{future}|curr_{past}) p_t(curr_{past}|Z) \quad (8)$$

### 530 **Mutual information estimation**

531 We use the k-nearest neighbor approach described in (**Kraskov et al., 2004**) to obtain mutual  
 532 information estimates of  $I_{future:in}$ ,  $I_{future:limit}$ ,  $I_{future:stim}$  and  $I_{past:in}$ . Here, the mutual information is  
 533 approximated via its corresponding complete gamma function:

$$I(X; Y) = \psi(K) - \langle \psi(n_x + 1) + \psi(n_y + 1) \rangle + \psi(N), \quad (9)$$

534 with  $N$  being the sample size, here  $N = 650,000$ . Given the skewed stimulus distributions shown  
 535 in **Figure 1-Figure Supplement 1**, we vary  $k = 10, \dots, 15$  and use the mean as the estimate in our  
 536 analysis.

### 537 **Variational approximation of optimal encoding of the predictive information (VIB)**

538 We use the variational approximation introduced in (**Alemi et al., 2016**). We first rewrite **Equation 5**  
 539 as:

$$\mathcal{L}'_{p(Z|curr_{past}),\beta'} = I_{future:in} - \beta' I_{past:in} \quad (10)$$

540 The minimization of **Equation 5** is equivalent to the maximization of **Equation 10** (i.e., when  $\beta' = \frac{1}{\beta}$ ,  
 541 **Equation 10** is the same as **Equation 5**).

542 Next, we minimize the following variational lower bound of **Equation 10**:

$$\mathcal{L}'_{p(Z|curr_{past}),\beta'} - \beta' H_{stim_{future}} \geq \mathcal{L}_{VIB} = \int dy dz p(curr_{future}, Z) \log q(curr_{future}|Z) - \beta' \int dcurr_{past} dz p(curr_{past}) p(Z|curr_{past}) \log \frac{p(Z|curr_{past})}{r(Z)} \quad (11)$$

543 The advantage of using this variational approximation of **Equation 10** is that we can constrain the  
 544 distribution of  $Z$  to a particular form (i.e., a 2-D Gaussian) while letting the distributions of  $x$  and  $y$

545 to be arbitrary. This provides us with a latent feature representation of the lower bound for the  
546 optimal encoding of predictive information.

547 In this work, we would like to understand the structure of the optimal encoding for the future  
548 stimulus given the input (the dendritic current, the VS axonal voltages, or the triplet voltages).  
549 Therefore, we obtain the respective solutions of  $\mathcal{L}_{VIB}$  with fixed  $\beta' = 40$ . This is the value that falls  
550 into the diminishing return part of the IB curves in both **Figure 3** and **Figure 4**. We also limit the  
551 dimension of  $Z$  to be 2 for direct comparison of inputs having different dimensions.

## 552 Acknowledgement

553 SW and IS and were supported by a grant from the Gatsby Charitable Foundation and by the Max  
554 Planck Hebrew University Center for Sensory Processing of the Brain in Action. The latter grant also  
555 supported AB. SEP was also supported by the National Science Foundation, both via CAREER award  
556 1652617, and through the Center for the Physics of Biological Function (PHY-1734030). This work  
557 was also supported by NIH grant R01EB026943 (SEP).

## 558 References

- 559 Ala-Laurila, P., Greschner, M., Chichilnisky, E., and Rieke, F. (2011). Cone photoreceptor contributions to noise  
560 and correlation in the retinal output. *Nat Neurosci*, 14:1309–1316.
- 561 Alemi, A. A., Fischer, I., Dillon, J. V., and Murphy, K. (2016). Deep Variational Information Bottleneck. *arXiv e-prints*,  
562 page arXiv:1612.00410.
- 563 Balint, C. N. and Dickinson, M. H. (2001). The correlation between wing kinematics and steering muscle activity  
564 in the blowfly calliphora vicina. *The Journal of experimental biology*, 204:4213–4226.
- 565 Bergou, A. J., Ristroph, L., Guckenheimer, J., Cohen, I., and Wang, Z. J. (2010). Fruit flies modulate passive wing  
566 pitching to generate in-flight turns. *Physical review letters*, 104:148101.
- 567 Berman, G., Bialek, W., and Shaevitz, J. (2016). Predictability and hierarchy in Drosophila behavior. *Proc Natl Acad  
568 Sci USA*, 113:11943–11948.
- 569 Blahut, R. (1972). Computation of channel capacity and rate-distortion functions. *IEEE Trans. Inf. Theor.*, 18(4):460–  
570 473.
- 571 Borst, A. and Weber, F. (2011). Neural action fields for optic flow based navigation: a simulation study of the fly  
572 lobula plate network. *PLoS One.*, 6(1):e16303.
- 573 Buschbeck, K. and Strausfeld, N. (1997). The relevance of neural architecture to visual performance: phylogenetic  
574 conservation and variation in Dipteran visual systems. *J Comp Neurol.*, 383(3):282–304.
- 575 Card, G. and Dickinson, M. (2008). Visually mediated motor planning in the escape response of Drosophila.  
576 *Current Biology*, 18(17):1300–7.
- 577 Chalk, M., Marre, O., and Tkacik, G. (2016). Relevant sparse codes with variational information bottleneck. *arXiv  
578 e-prints*, page arXiv:1605.07332.
- 579 Connors, B. (2017). Synchrony and so Much More: Diverse Roles for electrical Synapses in Neural Circuits. *Dev  
580 Neurobiol.*, 77(5):610–624.
- 581 Cuntz, H., Borst, A., and Segev, I. (2009). Optimization principles of dendritic structure. *Theor Biol Med Model.*,  
582 8:4–21.
- 583 Cuntz, H., Forstner, F., Schnell, B., Ammer, G., Raghu, S. V., and Borst, A. (2013). Preserving neural function under  
584 extreme scaling. *PLoS ONE*, 8(8):e71540.
- 585 Cuntz, H., Haag, J., Forstner, F., Segev, I., and Borst, A. (2007). Robust coding of flow-field parameters by  
586 axo-axonal gap junctions between fly visual interneurons. *Proc Natl Acad Sci USA*, 104:10229–10233.
- 587 Dickerson, B. H., de Souza, A. M., Huda, A., and Dickinson, M. H. (2019). Flies regulate wing motion via active  
588 control of a dual-function gyroscope. *Current Biology*, 29(20):3517–3524.

- 589 Dickinson, M. and Muijres, F. (2016). the aerodynamics and control of free flight manoeuvres in *Drosophila*. *Phil.*  
590 *Trans. R. Soc*, 371.
- 591 Dickinson, M. H. (2014). Death valley, *drosophila*, and the devonian toolkit. *Annual Review of Entomology*,  
592 59(1):51–72.
- 593 Dickson, W., Straw, A., Poelma, C., and Dickinson, M. (2006). An integrative model of insect flight control (invited).  
594 In *44th AIAA Aerospace Sciences Meeting and Exhibit*. American Institute of Aeronautics and Astronautics.
- 595 Domenici, P., Blagburn, J., and JP., B. (2011). Animal escapology I: theoretical issues and emerging trends in  
596 escape trajectories. *J Exp Biol.*, 214:2463–73.
- 597 Elyada, Y., Haag, J., and Borst, A. (2009). Different receptive fields in axons and dendrites underlie robust coding  
598 in motion-sensitive neurons. *Nat Neurosci.*, 12(3):327–332.
- 599 Fabian, S., Sumner, M., Wardill, T., Rossoni, S., and Gonzalez-Bellido, P. (2018). Interception by two predatory fly  
600 species is explained by a proportional navigation feedback controller. *J R Soc Interface*.
- 601 Fayyazuddin, A. and Dickinson, M. H. (1996). Haltere afferents provide direct, electrotonic input to a steering  
602 motor neuron in the blowfly, calliphora. *The Journal of neuroscience : the official journal of the Society for*  
603 *Neuroscience*, 16:5225–5232.
- 604 Fayyazuddin, A. and Dickinson, M. H. (1999). Convergent mechanosensory input structures the firing phase of a  
605 steering motor neuron in the blowfly, calliphora. *Journal of neurophysiology*, 82:1916–1926.
- 606 Haag, J. and Borst, A. (2004). Neural mechanism underlying complex receptive field properties of motion  
607 sensitive interneurons. *Nat Neurosci.*, 7:628–634.
- 608 Haag, J. and Borst, A. (2005). Dye-coupling visualizes networks of large-field motion-sensitive neurons in the fly.  
609 *Journal of Comparative Physiology A*, 191(5):445–454.
- 610 Haag, J. and Borst, A. (2007). Reciprocal inhibitory connections within a neural network for rotational optic-flow  
611 processing. *Frontiers in neuroscience*, 1:111–121.
- 612 Haag, J., Wertz, A., and Borst, A. (2007). Integration of lobula plate output signals by DNOVS1, an identified  
613 premotor descending neuron. *J Neurosci*.
- 614 Hagg, J. and Borst, A. (1996). The intrinsic electrophysiological characteristics of fly lobula plate tangential cells. *J*  
615 *Comput Neurosci*.
- 616 Hanlon, R. (2018). *Cephalopod behaviour*. Cambridge University Press.
- 617 Hateren and Schilstra (1999). Blowfly flight and optic flow. ii. head movements during flight. *The Journal of*  
618 *experimental biology*, 202 (Pt 11):1491–1500.
- 619 Heeger, D. (2017). Theory of cortical function. *Proc Natl Acad Sci USA*, 114(8):1773–1782.
- 620 Heide, G. (1983). Neural mechanisms of flight control in diptera. In *BIONAREport 2, W. Nachtigall, ed. (Gustav*  
621 *Fischer Verlag)*.
- 622 Heide, G. and Götz, K. G. (1996). Optomotor control of course and altitude in *drosophila melanogaster* is  
623 correlated with distinct activities of at least three pairs of flight steering muscles. *The Journal of experimental*  
624 *biology*, 199:1711–1726.
- 625 Higgins, I., Matthey, L., Pal, A., Burgess, C., Glorot, X., Botvinick, M., Mohamed, S., and Lerchner, A. (2017).  
626 beta-vae: Learning basic visual concepts with a constrained variational framework. In *International Conference*  
627 *on Learning Representations (ICLR)*, page ICLR.
- 628 Jacoby, J., Nath, A., Jessen, Z., and Schwartz, G. (2018). A self-regulating gap junction network of amacrine cells  
629 controls nitric oxide release in the retina. *Neuron*, 100(5):1149–1162.
- 630 Kingma, D. P. and Welling, M. (2013). Auto-Encoding Variational Bayes. *arXiv e-prints*, page arXiv:1312.6114.
- 631 Kraskov, A., Stogbauer, H., and Grassberger, P. (2004). Estimating mutual information. *Phy. Rev. E*, 69:066138.
- 632 Land, M. and Collett, T. (1974). Chasing behaviour of houseflies (*fannia canicularis*). *J. Compara*, 89:331–357.



- 633 Lehmann, F. and Gotz, K. (1996). Activation phase ensures kinematic efficacy in flight-steering muscles of  
634 *Drosophila melanogaster*. *Journal of Comparative Physiology A*, 179(3).
- 635 Lindsay, T., Sustar, A., and Dickinson, M. (2017). The function and organization of the motor system controlling  
636 flight maneuvers in flies. *Current Biology*, 27(3):345–358.
- 637 Lopez-Schier, H. (2019). Neuroplasticity in the acoustic startle reflex in larval zebrafish. *Current opinion in*  
638 *Neurobiology*, 54:134–139.
- 639 Marder, E. (1998). Electrical synapses: Beyond speed and synchrony to computation. *Current Biology*, 8:R795–  
640 R797.
- 641 Muijres, F., Elzinga, M., Melis, J., and Dickinson, M. (2014). Flies evade looming targets by executing rapid visually  
642 directed banked turns. *Science*, 344:172–177.
- 643 Muijres, F. T., Elzinga, M. J., Iwasaki, N. A., and Dickinson, M. H. (2015). Body saccades of *Drosophila* consist of  
644 stereotyped banked turns. *The Journal of experimental biology*, 218:864–875.
- 645 Palmer, S., Marre, O., Berry, M., and Bialek, W. (2015). Predictive information in a sensory population. *Proc Natl*  
646 *Acad Sci USA*, 112:6908–6913.
- 647 Ristroph, L., Bergou, A. J., Ristroph, G., Coumes, K., Berman, G. J., Guckenheimer, J., Wang, Z. J., and Cohen,  
648 I. (2010). Discovering the flight autostabilizer of fruit flies by inducing aerial stumbles. *Proceedings of the*  
649 *National Academy of Sciences*, 107(11):4820–4824.
- 650 Schilling, T. and Borst, A. (2015). Local motion detectors are required for the computation of expansion  
651 flow-fields. *Biol Open*, 4(9):1105–8.
- 652 Schilstra and Hateren (1999). Blowfly flight and optic flow. i. thorax kinematics and flight dynamics. *The Journal*  
653 *of experimental biology*, 202 (Pt 11):1481–1490.
- 654 Sederberg, A., MacLean, J., and Palmer, S. (2018). Learning to make external sensory stimulus predictions using  
655 internal correlations in populations of neurons. *Proc Natl Acad Sci USA*, 115(5):1105–1110.
- 656 Tishby, N., Pereira, F. C., and Bialek, W. (2000). The information bottleneck method. *arXiv e-prints*, page  
657 physics/0004057.
- 658 Trenholm, S., Schwab, D., Balasubramanian, V., and Awatramani, G. (2013). Lag normalization in an electrically  
659 coupled neural network. *Nat Neurosci*.
- 660 Trousdale, J., Carroll, S., Gabbiani, F., and Josi, K. (2014). Near-optimal decoding of transient stimuli from coupled  
661 neuronal subpopulations. *J. Neurosci.*, 34:12206–12222.
- 662 Tu, M. S. and Dickinson, M. H. (1996). The control of wing kinematics by two steering muscles of the blowfly  
663 (*Calliphora vicina*). *Journal of comparative physiology. A, Sensory, neural, and behavioral physiology*, 178:813–830.
- 664 van Breugel, F. and Dickinson, M. H. (2012). The visual control of landing and obstacle avoidance in the fruit fly  
665 *Drosophila melanogaster*. *The Journal of experimental biology*, 215:1783–1798.
- 666 van Hateren, J. (1992). A theory of maximizing sensory information. *Biol Cybern*, 68:23–29.
- 667 Wang, S., Borst, A., Zaslavsky, N., Tishby, N., and Segev, I. (2017). Efficient encoding of motion is mediated by gap  
668 junctions in the fly visual system. *Plos. Comp. Bio*, vol. 13, no. 12, p. e1005846, 13:e1005846.
- 669 Weber, F., Eichner, H., Cuntz, H., and Borst, A. (2008). Eigenanalysis of a neural network for optic flow processing.  
670 *New Journal of Physics*, 10:015–013.

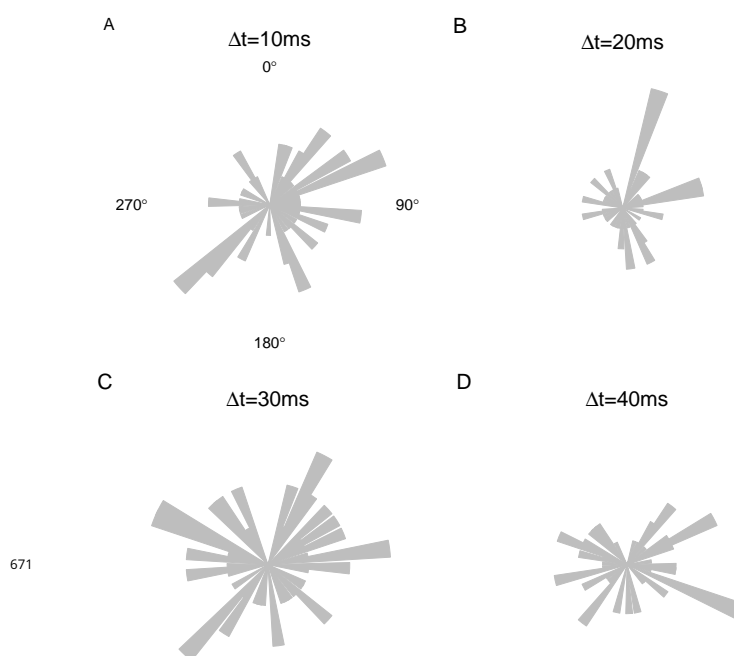

**Figure 1-Figure supplement 1.** Stimulus distributions for different time steps during the evasive maneuver. Here we focus on the stimuli to which the VS network is sensitive. Because the VS network is only responsive to combinations of roll and pitch motions, i.e., motions within the fly's coronal plane, we represent all stimuli with their corresponding vectors in this plane. A) The stimulus distribution at 10ms after the initiation of the evasive maneuver. B) Similar to A, but for the stimulus at 20ms after the start of the evasive maneuver. Here, most of the banked turns slow down and counter banked turns start. C) Similar to A, but for the stimulus at 30ms after the start of the evasive maneuver. This motion corresponds to the start of the counter-banked turn. D) Similar to A, but for the stimulus at 40ms after the start of the evasive maneuver. This motion corresponds to the slowing down of counter-banked turn and the completion of evasive maneuver. All of these stimulus distributions have entropy  $\sim 4 - 4.3$  bits.

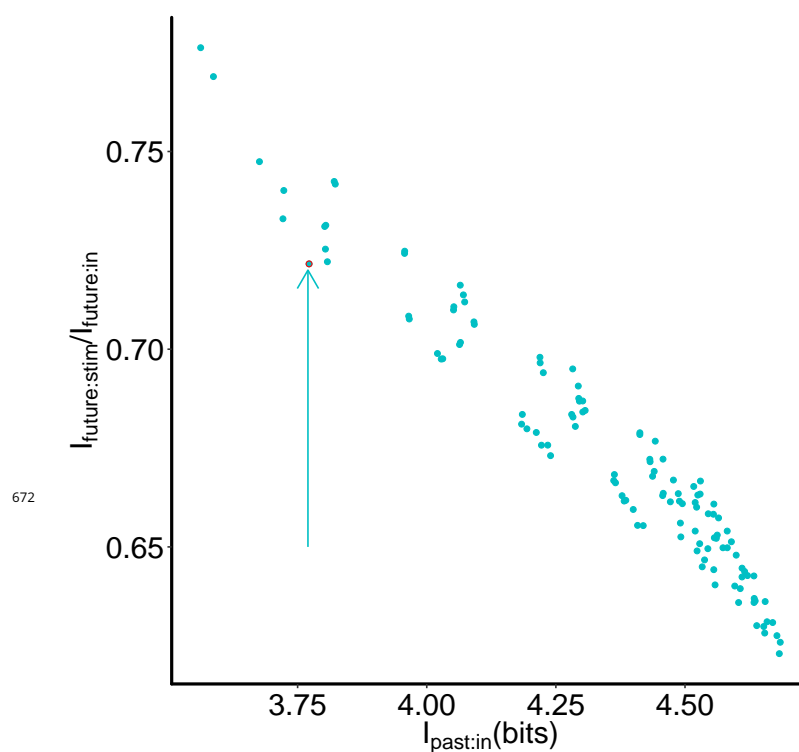

**Figure 4–Figure supplement 1.** How much a triplet based encoding retains from the past input vs. how much that information is about the future stimulus (out of the information about their own future input), for all 120 possible triplets. The particular VS 5,6,7 triplet (shown by the red circle and the arrow) that connects with the neck motor center, is one of the most efficient in terms of how much fraction its prediction of its own input is about the future stimulus, while its encoding cost  $I_{past:in}$  is modest.

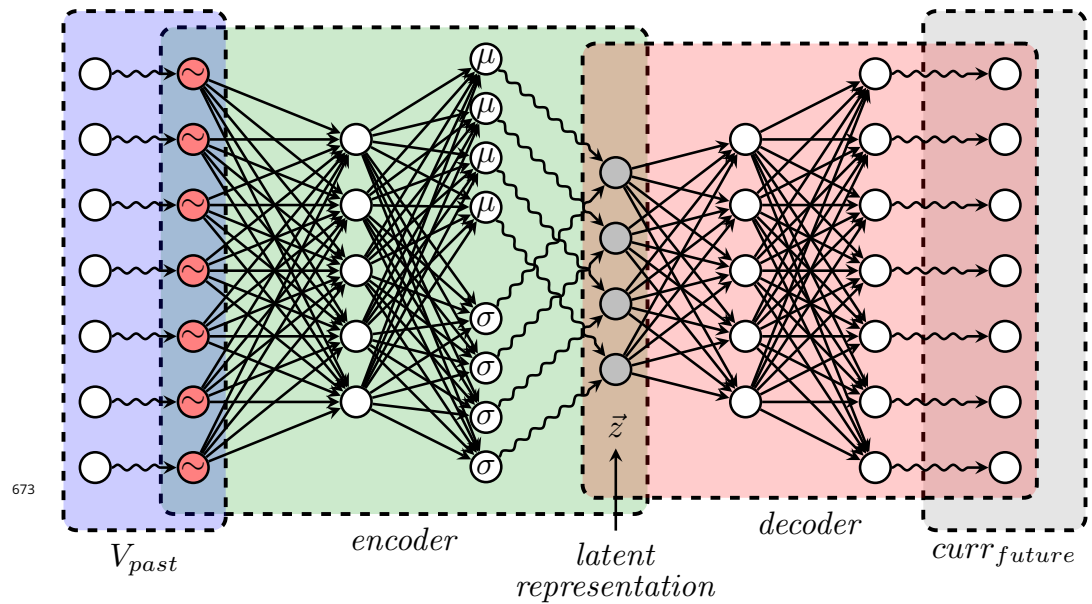

**Figure 5-Figure supplement 1.** Network schematic for the variational approximation of the information bottleneck solution (VIB). By constructing a variational approximation, the encoder learned a latent representation  $\bar{z}$  from the past VS voltages.  $W$  generates samples from  $\bar{z}$  and reads them out as the future input current to the VS network. Note the VS network does not have direct access to the stimulus, it uses the correlations between its past and future inputs induced by the stimulus as a proxy for the stimulus correlations, themselves.  $\bar{z}$  follows a Gaussian distribution, with parameters as  $\mu$  and  $\Sigma$ . During training for this VIB, the mean  $\mu$  and covariance matrix  $\Sigma$  of  $\bar{z}$  map the axonal voltages of VS to the future input. When the VIB succeeds, we obtain the predictive representation of the future stimulus by projecting their respective axonal voltages into the latent feature space of  $\bar{z}$ .

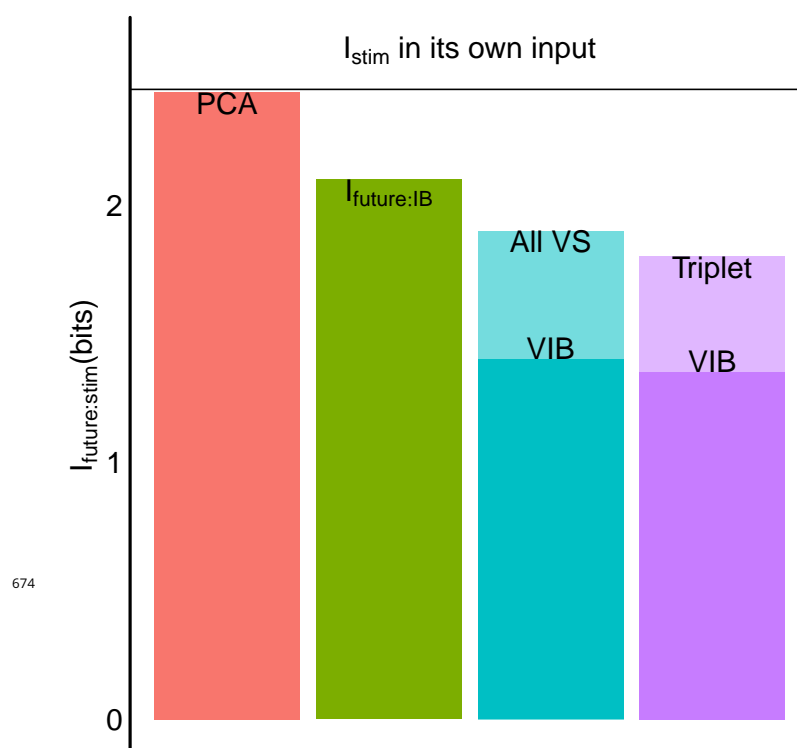

**Figure 5-Figure supplement 2.** Predictive information for the future stimulus 10ms after the evasive maneuver starts ( $\Delta t = 10ms$ ). The red bar shows that the PCA projection of the first 2PCs from the input current contains almost all of the stimulus information available at the input current itself. We use this PCA projection to understand whether it is possible to disentangle input stimuli from different quadrants using prediction in ???. The green bar shows the limit on prediction information, based on the information bottleneck method. It corresponds to the point on information curve at the given compression in **Figure 4B**. The cyan bar corresponds to the predictive information about the future stimulus using outputs from all VS cells. The darker-colored region shows how much information the corresponding VIB captures about the future stimulus. The purple bar is similar to the cyan bar, for predictive encodings of the VS 5-6-7 triplet vs. their respective VIB solution.



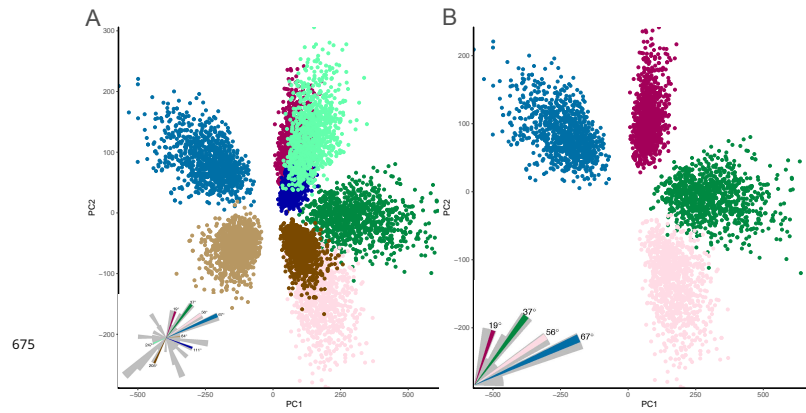

**Figure 5-Figure supplement 3.** The input to the VS network only supports local discrimination. A) The representation of 8 randomly selected stimuli within the plane whose dimensions are the first two principal components of the input currents. Note that there are substantial overlaps between clusters: e.g. the light-green cluster is almost on top of the dark-red/dark-blue clusters. B) The subset of 4 stimuli from A. The only difference, as compared to A, is that all these stimuli have the same pitch/roll directions (clockwise roll and up tilt pitch, i.e., they are all within the 1st quadrant of the fly's coronal plane).

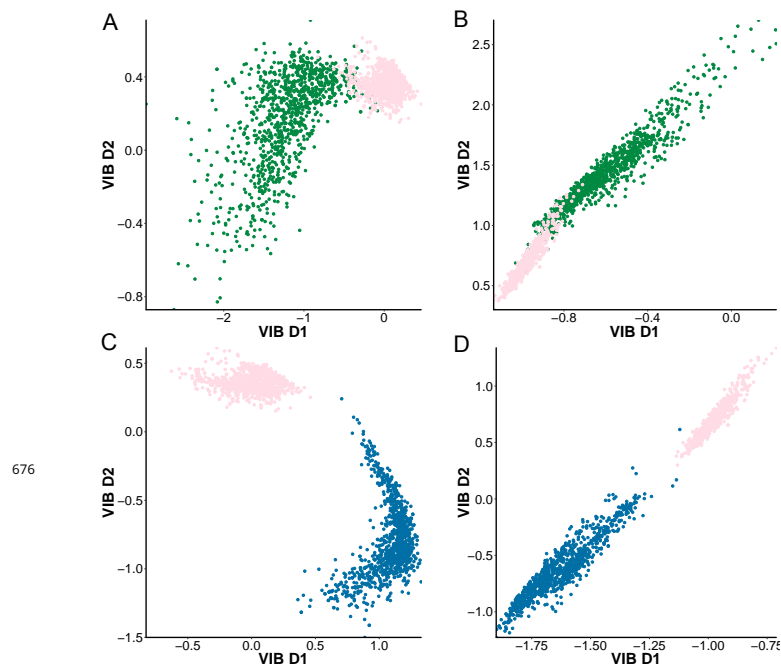

**Figure 5-Figure supplement 4.** The predictive information encoded by the VS network preferentially discriminates nearby stimuli. A) The predictive representation of stimuli at 19° and 37° obtained by mapping the respective axonal voltages of the entire VS network to the latent feature space generated by the VIB. B) Similar to A, but using the VS 5-6-7 triplet as input. C) The predictive representation of two stimuli that are much closer in stimulus space: 56° and 67°, respectively. Note that there is no overlap between these two nearby stimuli whereas there is some overlap for stimuli that are farther apart (shown in A). D) Similar to C, but using the VS 5-6-7 triplet as input.
